# Supplementary material
Source: Springer Nature journal article supplement (https://www.springermedizin.de/resource/supplementary/12957_2012_1126_MOESM2_ESM.pdf/9561836)

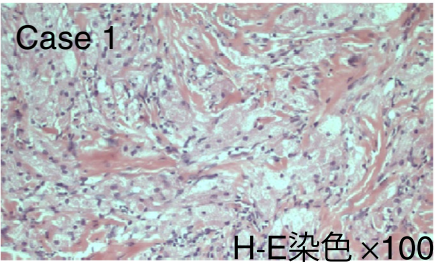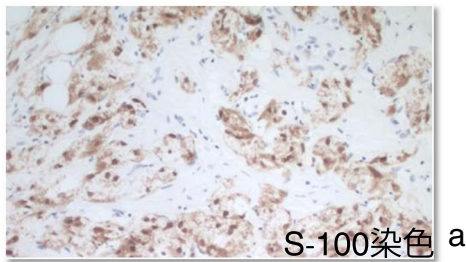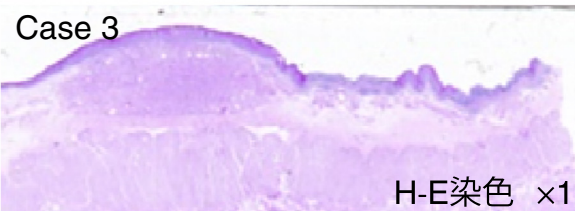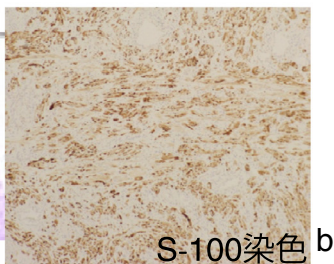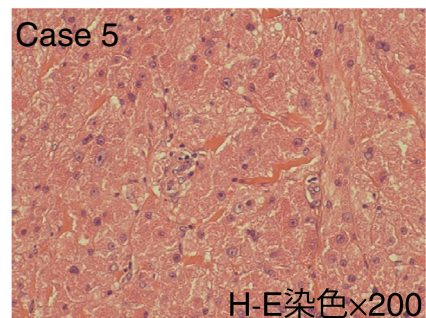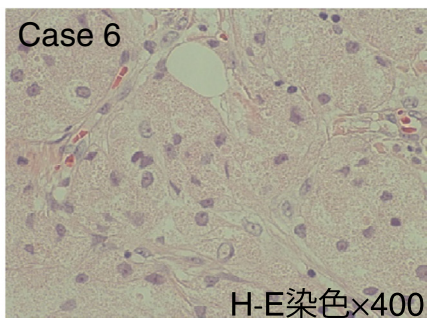

c

d

Supplement: MOESM2 [file 9561836]
